# Supplementary material for: Construction of the Pentacyclic Core and Formal Total Synthesis of (rac)‐Renieramycin T
Source: PubMed Central journal article supplement — ChemistryOpen. 2018 Aug 7;7(10):764–71. doi: 10.1002/open.201800112 (PMC6173372; doi:10.1002/open.201800112), 2018-08-07

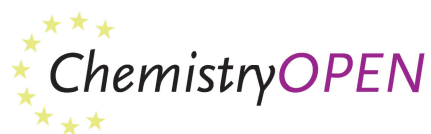

## Supporting Information

© 2018 The Authors. Published by Wiley-VCH Verlag GmbH & Co. KGaA, Weinheim

### **Construction of the Pentacyclic Core and Formal Total Synthesis of (*rac*)-Renieramycin T**

Shinya Kimura and Naoki Saito<sup>\*[a]</sup>

open\_201800112\_sm\_miscellaneous\_information.pdf

## Supporting Information: open.201800112

### Table of contents (Index)

#### <sup>1</sup>H- and <sup>13</sup>C-NMR Charts of Compounds

|                                                                                                           |    |
|-----------------------------------------------------------------------------------------------------------|----|
| 1. Compound 6.....                                                                                        | 3  |
| 2. Compound 7.....                                                                                        | 4  |
| 3. Compound SI1.....                                                                                      | 5  |
| 4. Compound 8.....                                                                                        | 6  |
| 5. Compound 9.....                                                                                        | 7  |
| 6. Compound SI2.....                                                                                      | 8  |
| 7. Compound 10.....                                                                                       | 9  |
| 8. Compound 11.....                                                                                       | 10 |
| 9. Compound 13.....                                                                                       | 11 |
| 10. Compound SI3.....                                                                                     | 12 |
| 11. Compound 14.....                                                                                      | 13 |
| 12. Compound 18.....                                                                                      | 14 |
| 13. Compound 19.....                                                                                      | 15 |
| 14. Compound ( <i>rac</i> )-20.....                                                                       | 16 |
| 15. Authentic sample (+)-20.....                                                                          | 17 |
| 16. Comparison of <sup>1</sup> H- and <sup>13</sup> C-NMRassignment for ( <i>rac</i> )-20 and (+)-20..... | 18 |

SKRT15-6-Fr7-8 s.sls

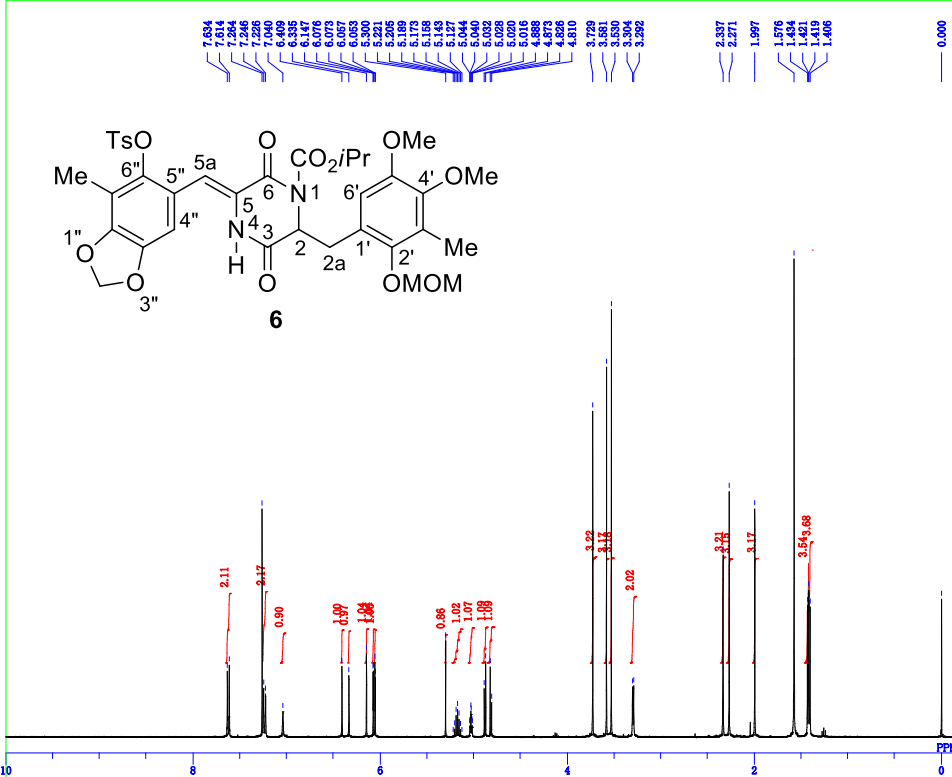

DFILE SKRT15-6-Fr7-8 s.sls  
 COMNT SKRT15-6-Fr7-8  
 DATIM Mon Jun 24 15:56:49 2013  
 OBNUC 1H  
 EXMOD NON  
 OBFREQ 399.65 MHz  
 OBSSET 124.00 KHz  
 OBFIN 10500.00 Hz  
 POINT 16384  
 FREQU 7992.01 Hz  
 SCANS 16  
 ACQTM 2.9500 sec  
 PD 4.9500 sec  
 PW1 5.80 usec  
 IRNUC 1H  
 CTMP 24.5 c  
 SLVNT CDCL3  
 EXREF 0.00 ppm  
 BF 0.01 Hz  
 RGAIN 21

SKRT15 Auto2BCM s.EI.sls

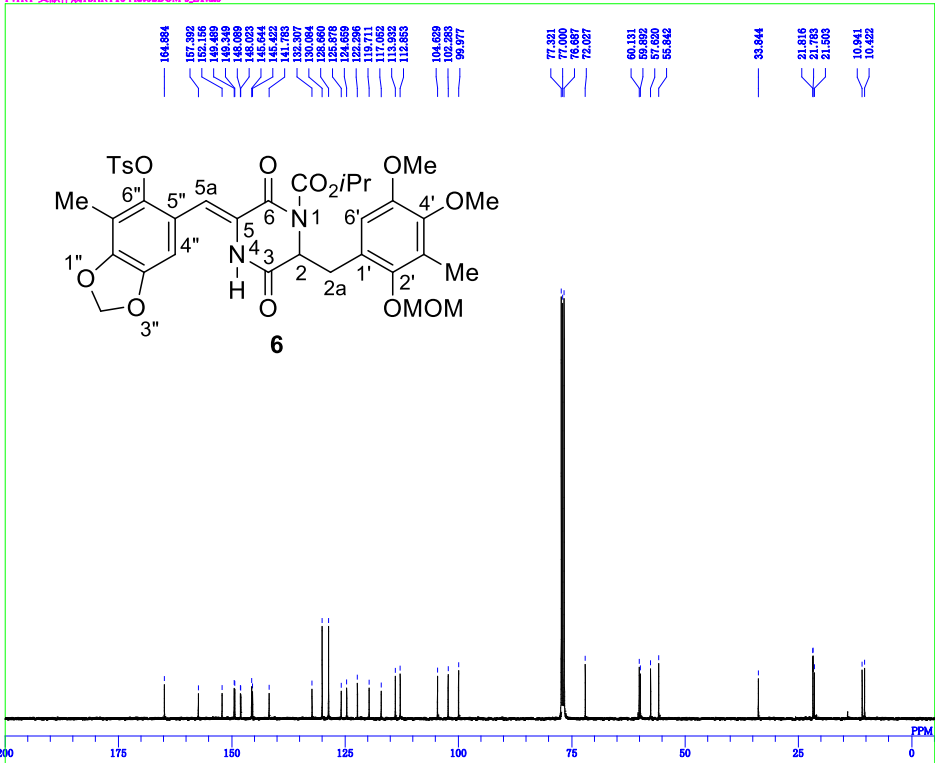

DFILE SKRT15 Auto2BCM s.EI.sls  
 COMNT SKRT15  
 DATIM Wed Sep 12 23:57:37 2012  
 OBNUC 13C  
 EXMOD BCM  
 OBFREQ 100.40 MHz  
 OBSSET 125.00 KHz  
 OBFIN 10500.00 Hz  
 POINT 32768  
 FREQU 27118.64 Hz  
 SCANS 6400  
 ACQTM 1.2053 sec  
 PD 1.7920 sec  
 PW1 6.00 usec  
 IRNUC 13C  
 CTMP 25.0 c  
 SLVNT CDCL3  
 EXREF 77.00 ppm  
 BF 2.00 Hz  
 RGAIN 25

SKRT17-2-Dring1NON e.EI.als

PVRT 文獻作成SKRT17-2-Dring1NON e.EI.als

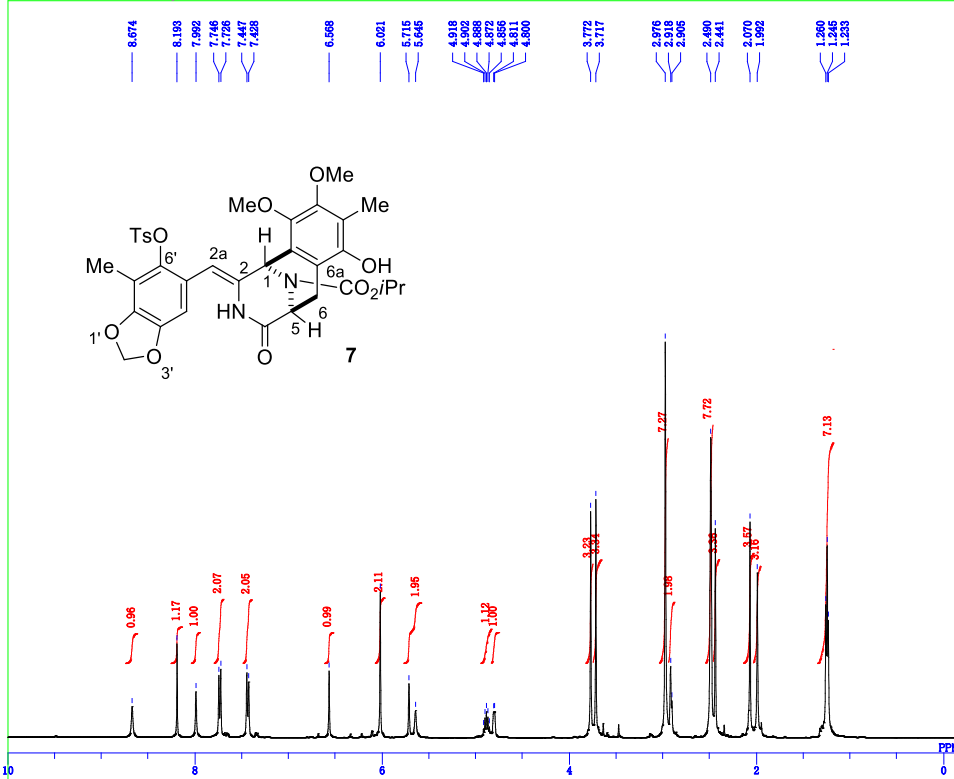

DFILE SKRT17-2-Dring1NON e.E  
 COMNT SKRT17-2-Dring  
 DATIM Mon Sep 10 20:14:34 2012  
 OBNUC 1H  
 EXMOD NON  
 OBFREQ 399.65 MHz  
 OBSSET 124.00 KHz  
 OBFWH 10500.00 Hz  
 POINT 16384  
 FREQU 7992.01 Hz  
 SCANS 16  
 ACQTM 2.0500 sec  
 PD 4.9500 sec  
 PW1 5.80 usec  
 IRNUC 1H  
 CTMP 100.2 c  
 SLVNT DMSO  
 EXREF 2.49 ppm  
 BF 2.00 Hz  
 RGAIN 12

SKRT17-2-Dring2BCM e.EI.als

PVRT 文獻作成SKRT17-2-Dring2BCM e.EI.als

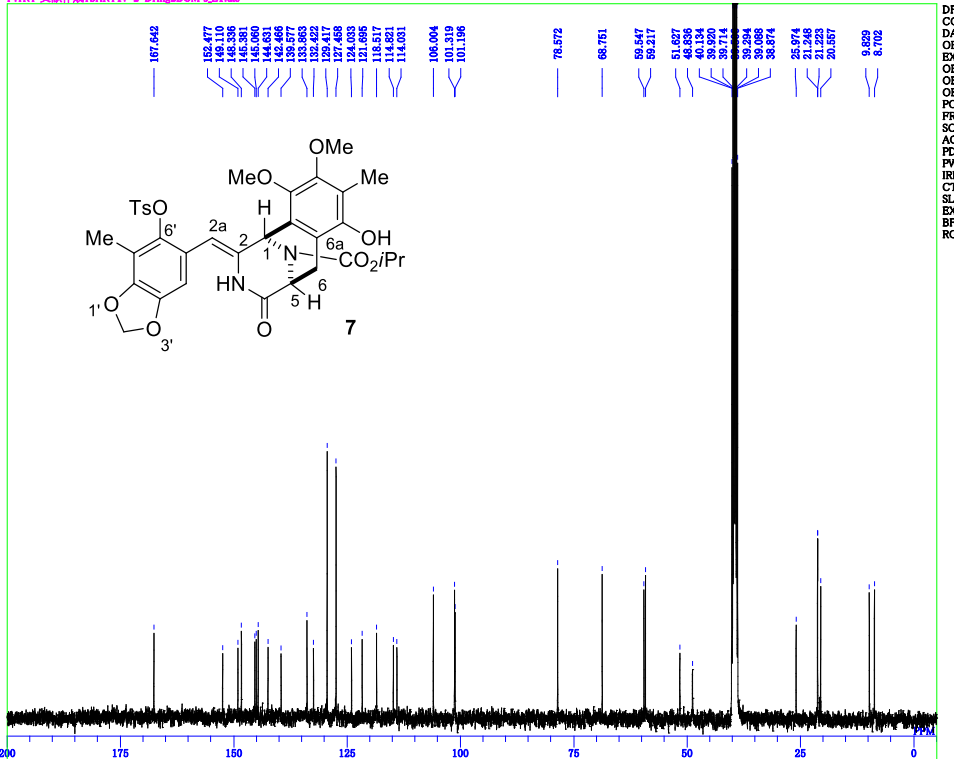

DFILE SKRT17-2-Dring2BCM e.E  
 COMNT SKRT17-2-Dring  
 DATIM Tue Sep 11 01:34:52 2012  
 OBNUC 13C  
 EXMOD BCM  
 OBFREQ 100.40 MHz  
 OBSSET 125.00 KHz  
 OBFWH 10500.00 Hz  
 POINT 32768  
 FREQU 27118.64 Hz  
 SCANS 6400  
 ACQTM 1.2053 sec  
 PD 1.7920 sec  
 PW1 6.00 usec  
 IRNUC 13C  
 CTMP 100.2 c  
 SLVNT DMSO  
 EXREF 39.50 ppm  
 BF 2.00 Hz  
 RGAIN 24

NAME: 4-19-17-07  
F:\VRT 文獻作成\2018.5.29 動物産L\SKRT18-TM\_NON-1-1\_als.s.als

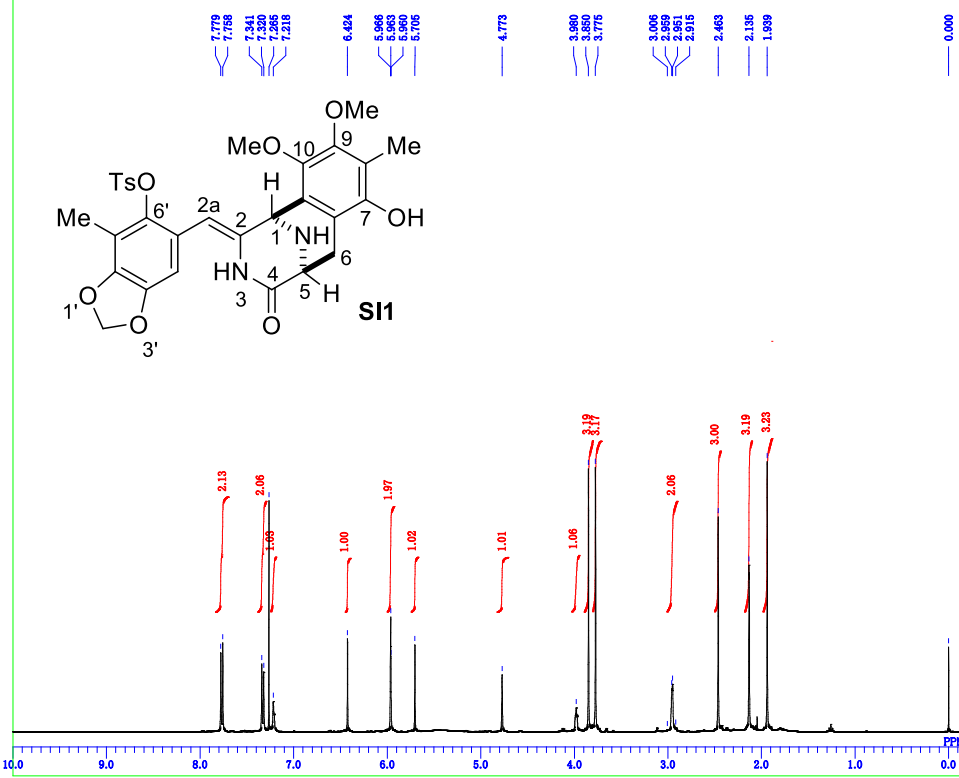

DFILE SKRT18-TM\_NON-1-1.als  
 COMNT SKRT18-TM\_NON  
 DATIM 2018-06-29 19:02:16  
 OBNUC 1H  
 EXMOD single\_pulse.jp  
 OBRFQ 399.78 MHz  
 OBSST 4.19 KHz  
 OBFIN 7.29 Hz  
 POINT 32767  
 FREQU 7503.00 Hz  
 SCANS 16  
 ACQTM 4.3873 sec  
 PD 5.0000 sec  
 PW1 3.35 usec  
 IRNUC 1H  
 CTMP 21.8 c  
 SLVNT CDCL3  
 EXREF 0.00 ppm  
 BF 0.01 Hz  
 RGAIN 38

NAME: 4-19-17-07  
F:\VRT 文獻作成\2018.5.29 動物産L\SKRT18-TM\_BCM-1-1\_als.s.als

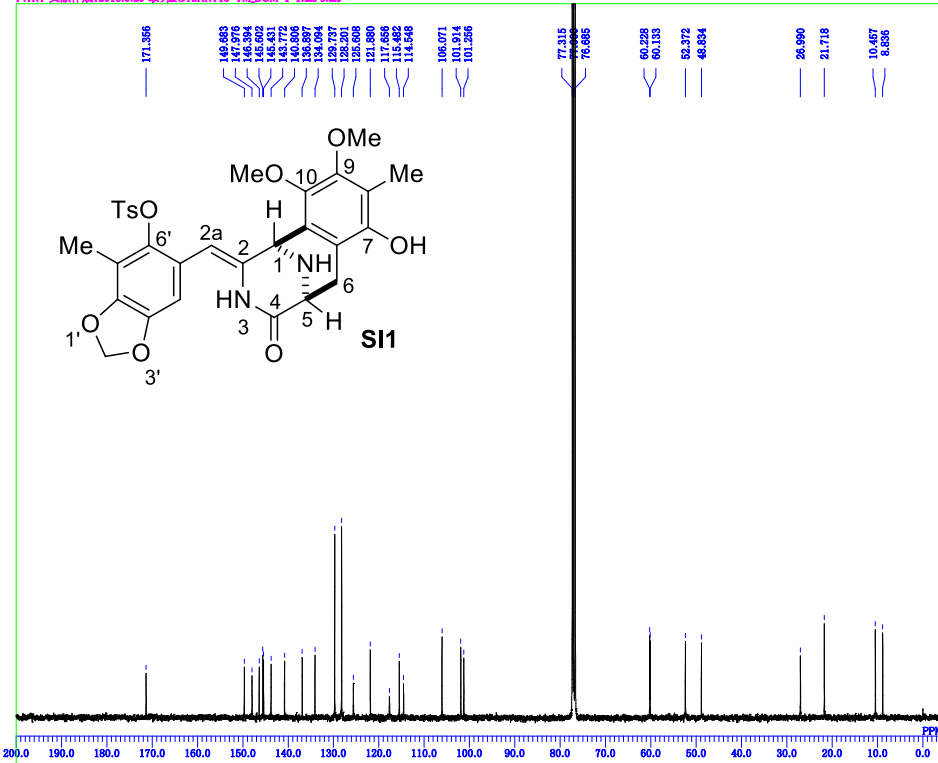

DFILE SKRT18-TM\_BCM-1-1.als  
 COMNT SKRT18-TM\_BCM  
 DATIM 2018-06-29 19:06:23  
 OBNUC 13C  
 EXMOD single\_pulse.dec  
 OBRFQ 100.63 MHz  
 OBSST 5.35 KHz  
 OBFIN 5.89 Hz  
 POINT 26214  
 FREQU 26125.63 Hz  
 SCANS 2000  
 ACQTM 1.9433 sec  
 PD 2.0000 sec  
 PW1 3.63 usec  
 IRNUC 13C  
 CTMP 21.5 c  
 SLVNT CDCL3  
 EXREF 77.00 ppm  
 BF 2.00 Hz  
 RGAIN 60

SKRT20-1-TMINON\_E1.s

F:\VRT 文獻作成\SKRT20-1-TMINON\_E1.s

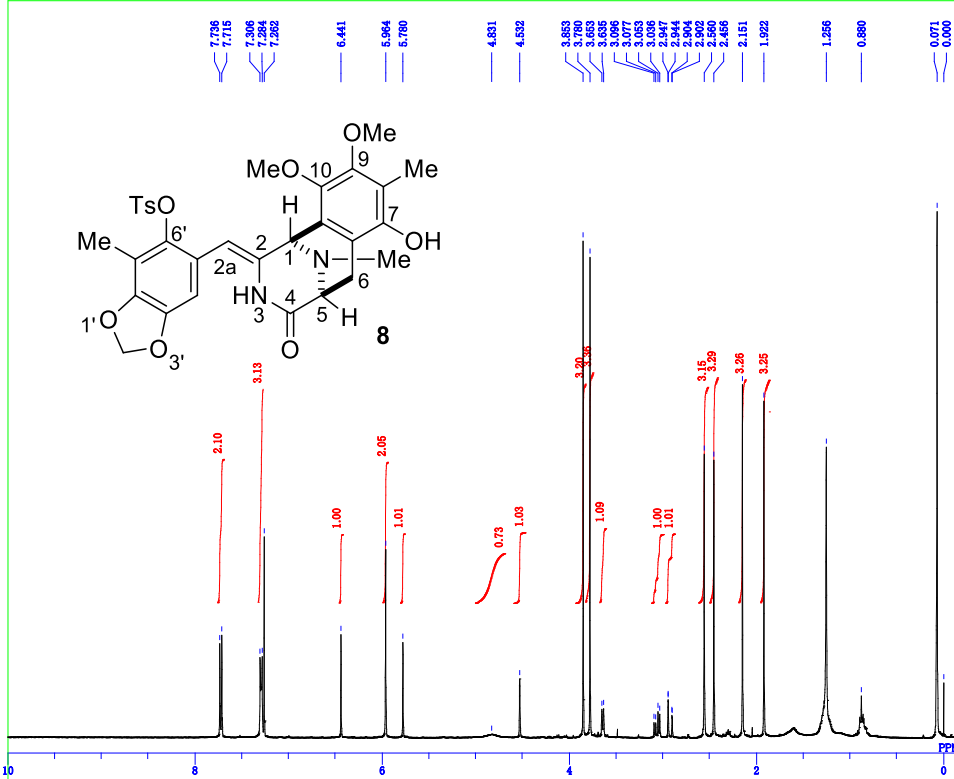

D:\FILE SKRT20-1-TMINON\_E1.s  
 COMNT SKRT20-1-TM  
 DATIM Tue Dec 11 21:23:15 2012  
 OBNUC 1H  
 EXMOD NON  
 OBRFQ 399.65 MHz  
 OBSST 124.00 KHz  
 OBFIN 10500.00 Hz  
 POINT 16384  
 FREQU 7992.01 Hz  
 SCANS 16  
 ACQTM 2.0500 sec  
 PD 4.9500 sec  
 PW1 5.80 usec  
 IRNUC 1H  
 CTEMP 23.7 c  
 SLVNT CDCL3  
 EXREF 0.00 ppm  
 BF 0.01 Hz  
 RGAIN 17

SKRT20-1-TM2BCM\_E1.s

F:\VRT 文獻作成\SKRT20-1-TM2BCM\_E1.s

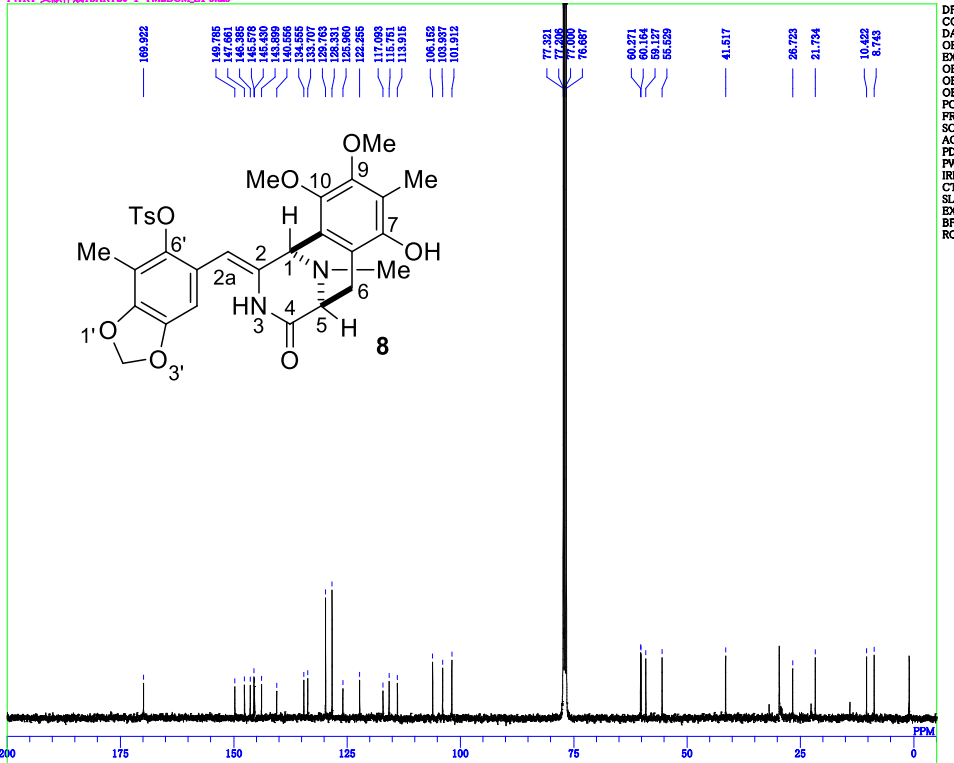

D:\FILE SKRT20-1-TM2BCM\_E1.s  
 COMNT SKRT20-1-TM  
 DATIM Wed Dec 12 02:45:54 2012  
 OBNUC 13C  
 EXMOD BCM  
 OBRFQ 100.40 MHz  
 OBSST 125.00 KHz  
 OBFIN 10500.00 Hz  
 POINT 32768  
 FREQU 27118.64 Hz  
 SCANS 6400  
 ACQTM 1.2853 sec  
 PD 1.7920 sec  
 PW1 6.00 usec  
 IRNUC 1H  
 CTEMP 24.3 c  
 SLVNT CDCL3  
 EXREF 77.00 ppm  
 BF 2.00 Hz  
 RGAIN 25

SKRT21-1-Pr11-1511N

FVRT 文獻作成SKRT21-1-Pr11-1511N s.EI.ah

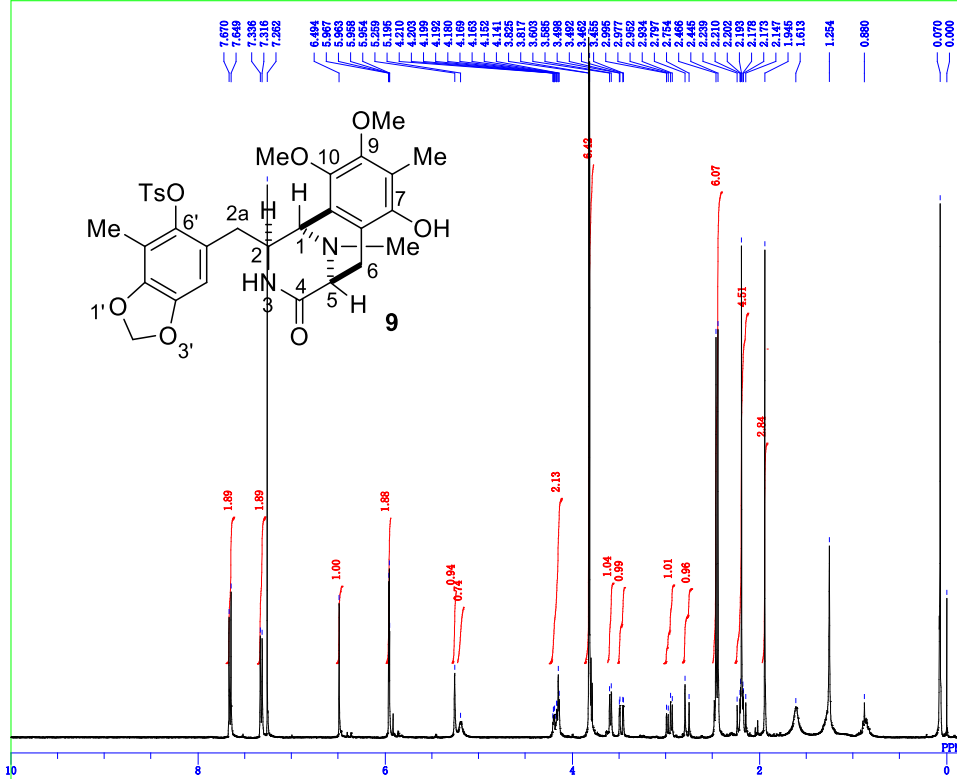

DFILE SKRT21-1-Pr11-1511N  
 COMNT SKRT21-1-Pr11-15  
 DATIM Sun Dec 23 16:44:28 2012  
 OBNUC 1H  
 EXMOD NON  
 OBFREQ 399.65 MHz  
 OBSSET 124.00 KHz  
 OBFIN 10500.00 Hz  
 POINT 16384  
 FREQU 7992.01 Hz  
 SCANS 16  
 ACQTM 2.0500 sec  
 PD 4.9500 sec  
 PW1 5.80 usec  
 IRNUC 1H  
 CTMP 22.6 c  
 SLVNT CDCL3  
 EXREF 0.00 ppm  
 BF 0.01 Hz  
 RGAIN 19

SKRT21-1-Pr11-152BCM

FVRT 文獻作成SKRT21-1-Pr11-152BCM s.EI.ah

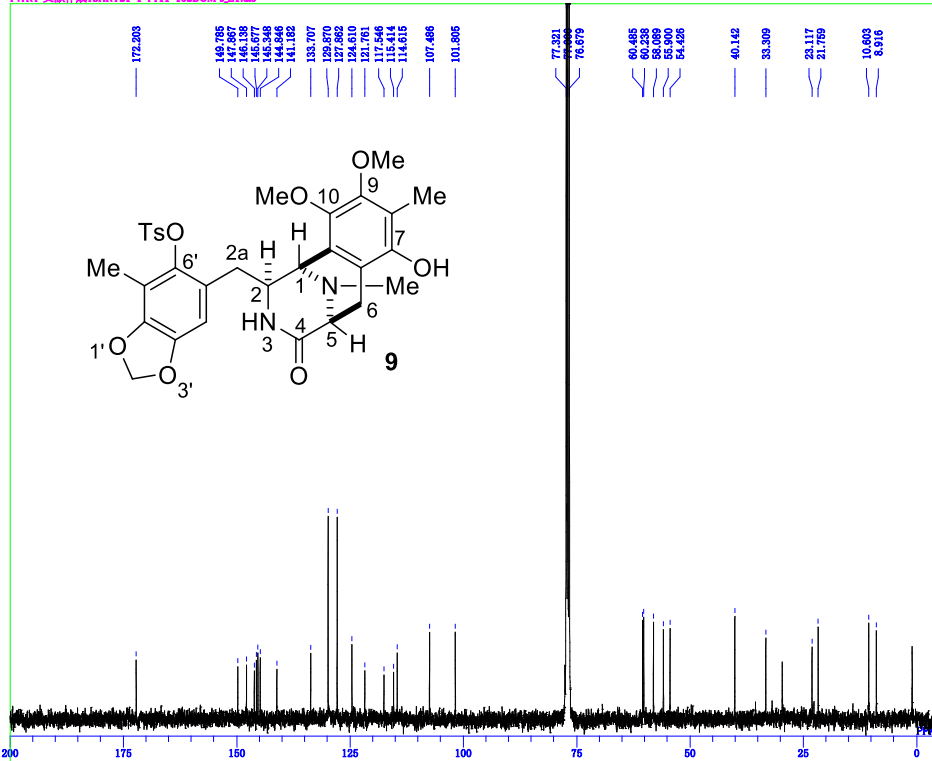

DFILE SKRT21-1-Pr11-152BCM  
 COMNT SKRT21-1-Pr11-15  
 DATIM Sun Dec 23 22:07:13 2012  
 OBNUC 13C  
 EXMOD BCM  
 OBFREQ 100.40 MHz  
 OBSSET 125.00 KHz  
 OBFIN 10500.00 Hz  
 POINT 32768  
 FREQU 27118.64 Hz  
 SCANS 6400  
 ACQTM 1.2053 sec  
 PD 1.7920 sec  
 PW1 6.00 usec  
 IRNUC 13C  
 CTMP 24.1 c  
 SLVNT CDCL3  
 EXREF 77.00 ppm  
 BF 2.00 Hz  
 RGAIN 24

SKRT44-1-Allyl-Fr61NON.EI.s.als

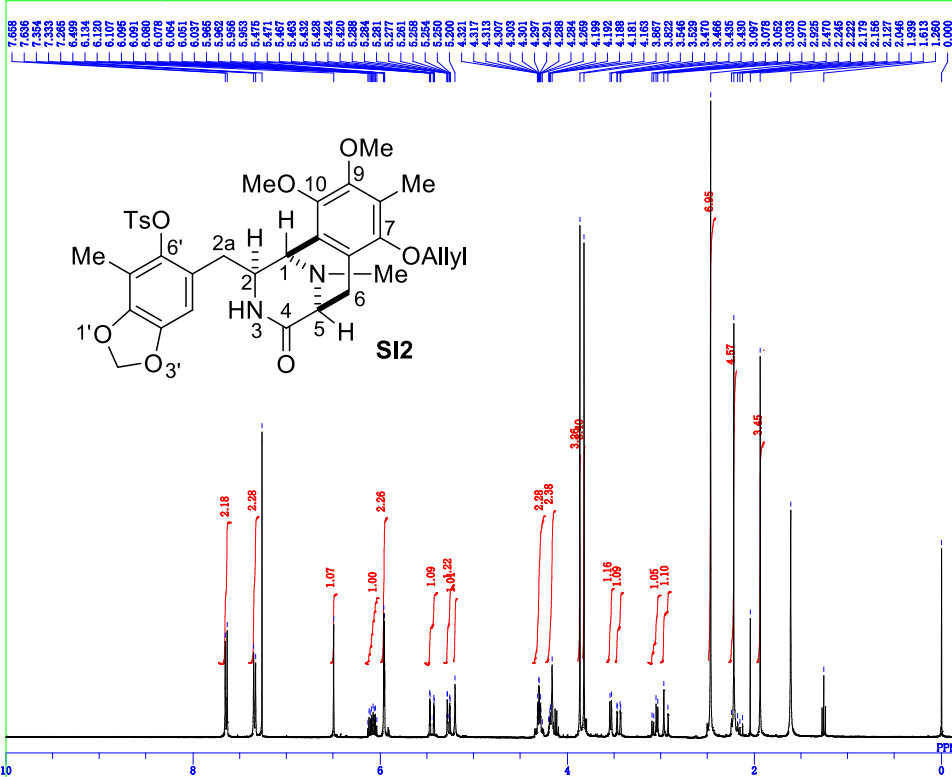

DFILE SKRT44-1-Allyl-Fr61NON  
COMINT SKRT44-1-Allyl-Fr6  
DATIM Sun Oct 12 14:51:40 2014  
OBNUC 1H  
EXMOD NON  
OBFREQ 399.65 MHz  
OBSSET 124.00 KHz  
OBFIN 10500.00 Hz  
POINT 16384  
FREQU 7992.01 Hz  
SCANS 16  
ACQTM 2.9500 sec  
PD 4.9500 sec  
PW1 5.80 usec  
IRNUC 1H  
CTEMP 23.6 c  
SLVNT CDCL3  
EXREF 0.00 ppm  
BF 0.01 Hz  
RGAIN 19

SKRT44-1-Allyl-Fr6-TM.BCM-1-1.3.f

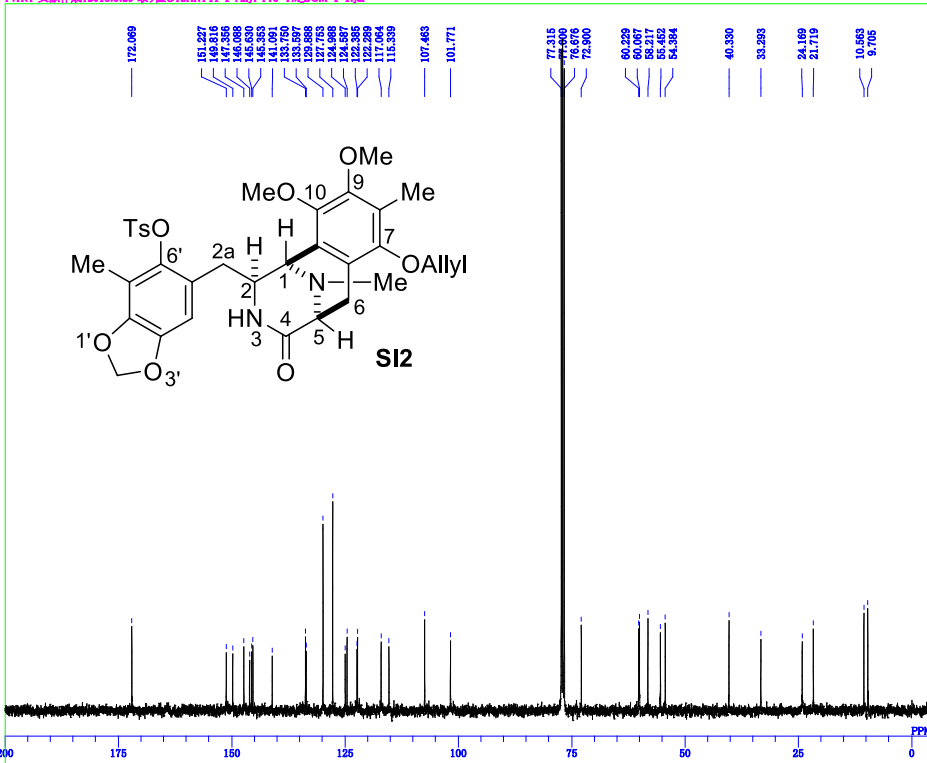

DFILE SKRT44-1-Allyl-Fr6-TM.B  
COMINT SKRT44-1-Allyl-Fr6-TM-B  
DATIM 2018-06-29 16:18:18  
OBNUC 13C  
EXMOD single\_pulse\_dec  
OBFREQ 100.53 MHz  
OBSSET 5.35 KHz  
OBFIN 5.85 Hz  
POINT 32767  
FREQU 31407.04 Hz  
SCANS 400  
ACQTM 1.0453 sec  
PD 2.0000 sec  
PW1 3.63 usec  
IRNUC 1H  
CTEMP 21.7 c  
SLVNT CDCL3  
EXREF 77.00 ppm  
BF 2.00 Hz  
RGAIN 60



DMT132 0 10/11 11:14 19 19CM  
 PVRT 文獻作成SKRT49-5-KOH-Fr14-19.NON-1-1.sals

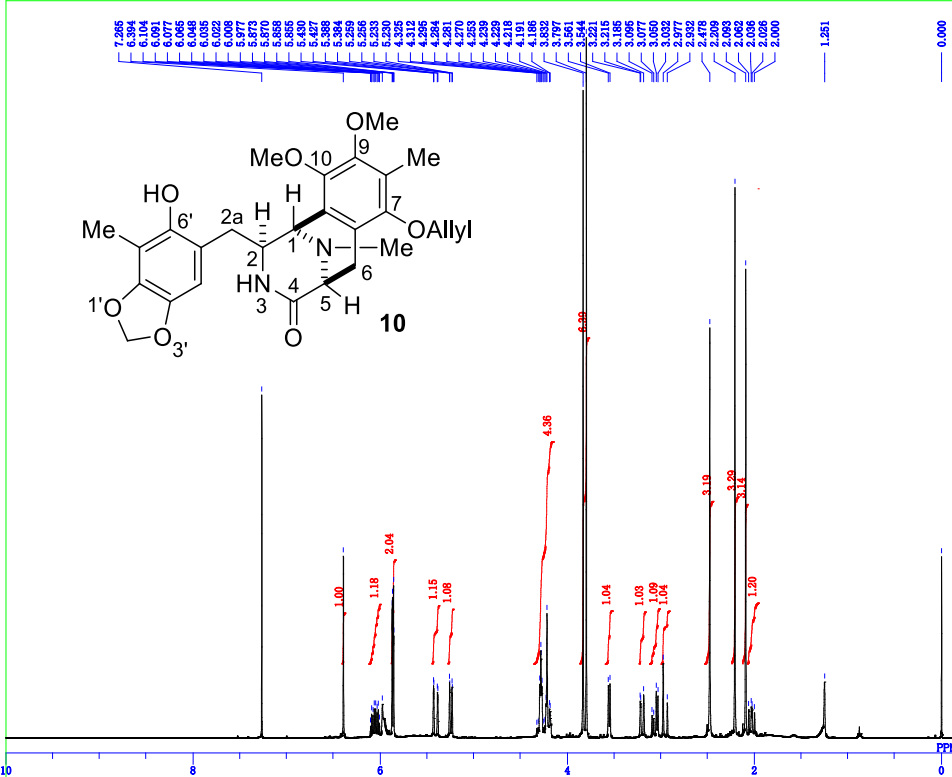

DFILE SKRT49-5-KOH-Fr14-19J  
 COMNT SKRT49-5-KOH-Fr14-19-  
 DATIM 2014-11-06 13:48:36  
 OBNUC 1H  
 EXMOD single\_pulse.jpz  
 OBFRQ 399.78 MHz  
 OBSST 4.19 KHz  
 OBFIN 7.29 Hz  
 POINT 26214  
 FREQU 6002.40 Hz  
 SCANS 16  
 ACQTM 4.3873 sec  
 PD 2.0000 sec  
 PW1 3.00 usec  
 IRNUC 1H  
 CTMP 20.9 c  
 SLVNT CDCL3  
 EXREF 0.00 ppm  
 BF 0.01 Hz  
 RGAIN 36

DMT132 0 10/11 11:12 19 19CM  
 PVRT 文獻作成SKRT49-5-KOH-Fr14-19.COM-1-1.sals

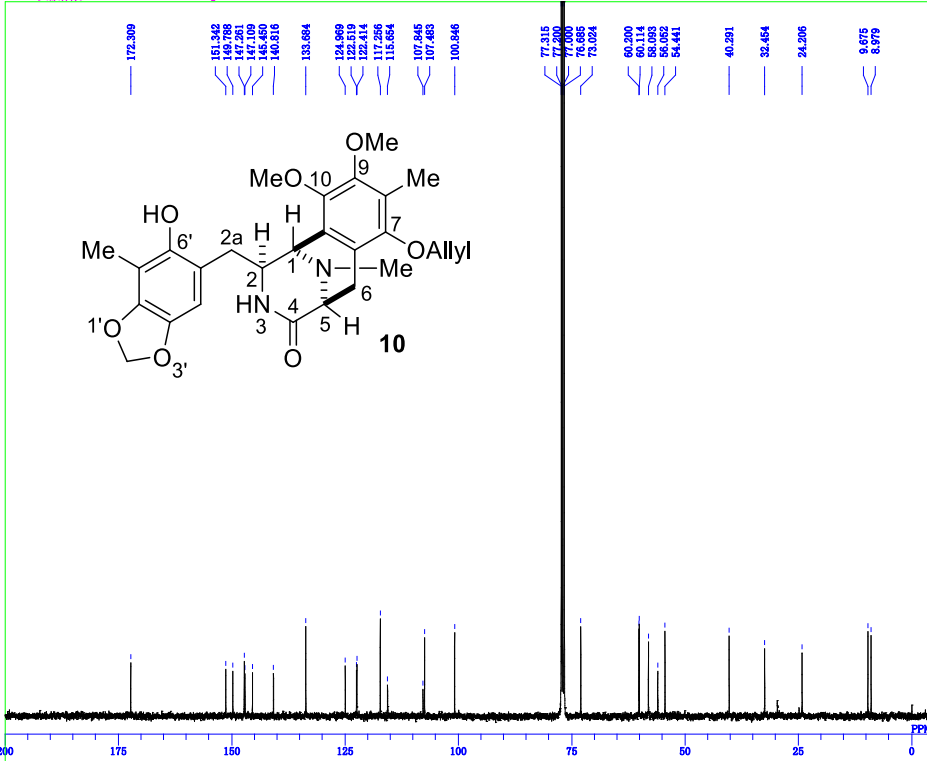

DFILE SKRT49-5-KOH-Fr14-19J  
 COMNT SKRT49-5-KOH-Fr14-19-  
 DATIM 2014-11-06 13:53:34  
 OBNUC 13C  
 EXMOD single\_pulse\_dec  
 OBFRQ 100.63 MHz  
 OBSST 5.35 KHz  
 OBFIN 6.89 Hz  
 POINT 26214  
 FREQU 25125.63 Hz  
 SCANS 2000  
 ACQTM 1.0453 sec  
 PD 1.7000 sec  
 PW1 3.70 usec  
 IRNUC 1H  
 CTMP 20.9 c  
 SLVNT CDCL3  
 EXREF 77.00 ppm  
 BF 2.03 Hz  
 RGAIN 60

DMT0104 9 CN F111 10 130M1  
 FVRT 文獻作成SKRT51-3-CN-Fr11-13\_no-1-1.sals

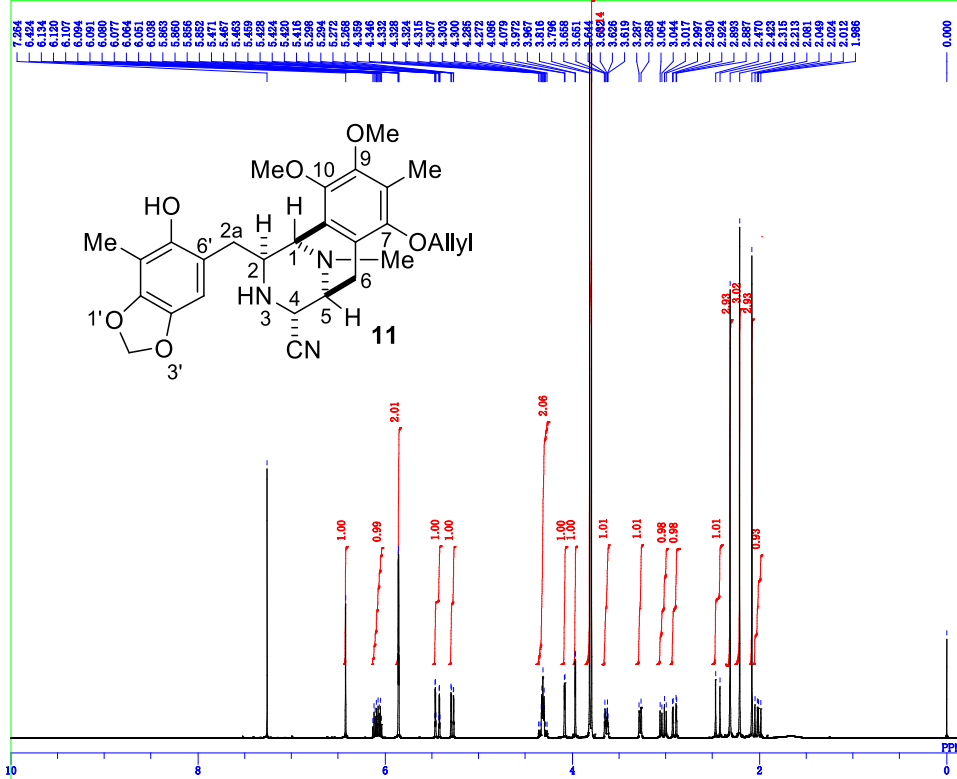

DFILE SKRT51-3-CN-Fr11-13\_no  
 COMNT SKRT51-3-CN-Fr11-13-no  
 DATIM 2014-11-19 19:31:23  
 OBNUC 1H  
 EXMOD single\_pulse.jsp  
 OBFRQ 399.78 MHz  
 OBSST 4.19 KHz  
 OBFIN 7.29 Hz  
 POINT 26214  
 FREQU 6002.40 Hz  
 SCANS 16  
 ACQTM 4.3873 sec  
 PD 2.0000 sec  
 PW1 3.00 usec  
 IRNUC 1H  
 CTMP 20.8 c  
 SLVNT CDCL3  
 EXREF 0.00 ppm  
 BF 0.01 Hz  
 RGAIN 30

DMT0104 9 CN F111 10 130M1  
 FVRT 文獻作成SKRT51-3-CN-Fr11-13\_BCM-1-1.sals

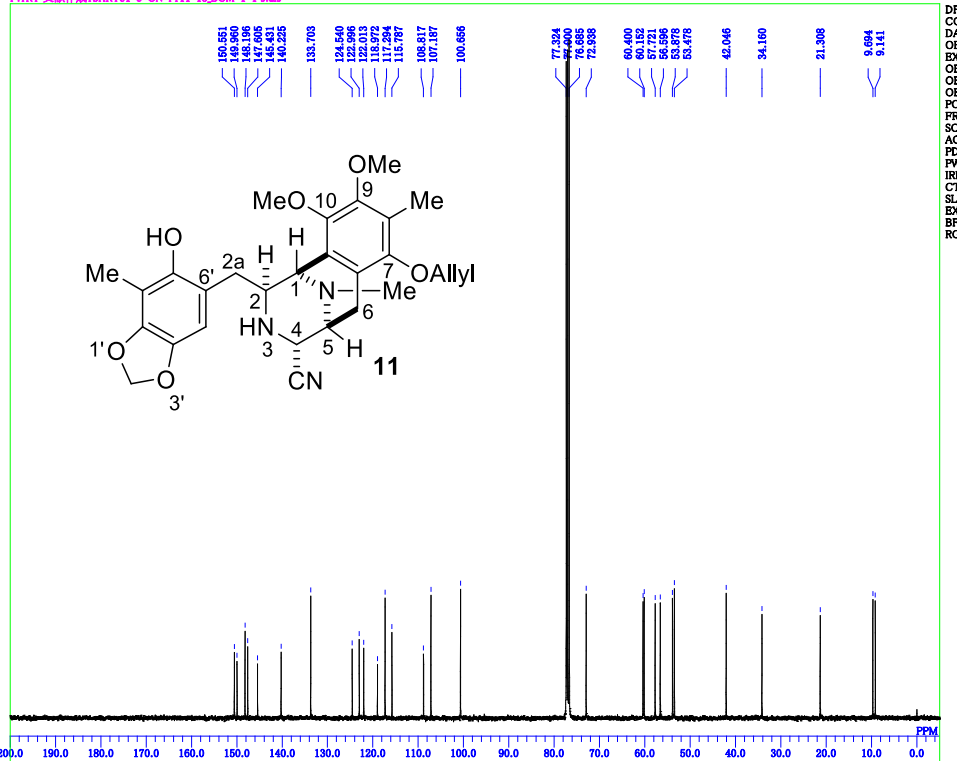

DFILE SKRT51-3-CN-Fr11-13\_BK  
 COMNT SKRT51-3-CN-Fr11-13-BK  
 DATIM 2014-11-19 19:46:48  
 OBNUC 13C  
 EXMOD single\_pulse\_dec  
 OBFRQ 100.63 MHz  
 OBSST 5.35 KHz  
 OBFIN 6.89 Hz  
 POINT 26214  
 FREQU 25125.63 Hz  
 SCANS 3200  
 ACQTM 1.0453 sec  
 PD 1.7000 sec  
 PW1 3.70 usec  
 IRNUC 13C  
 CTMP 21.1 c  
 SLVNT CDCL3  
 EXREF 77.00 ppm  
 BF 2.00 Hz  
 RGAIN 60

DATAFILE 11-Boc-Re3-Pr6-11-1als.sals  
 C:\Users\kimura\Desktop\RT 投稿\NMR\2018.6.9\SKRT64-11-Boc-Re3-Pr6-8-2ndNON-1-1als.sals

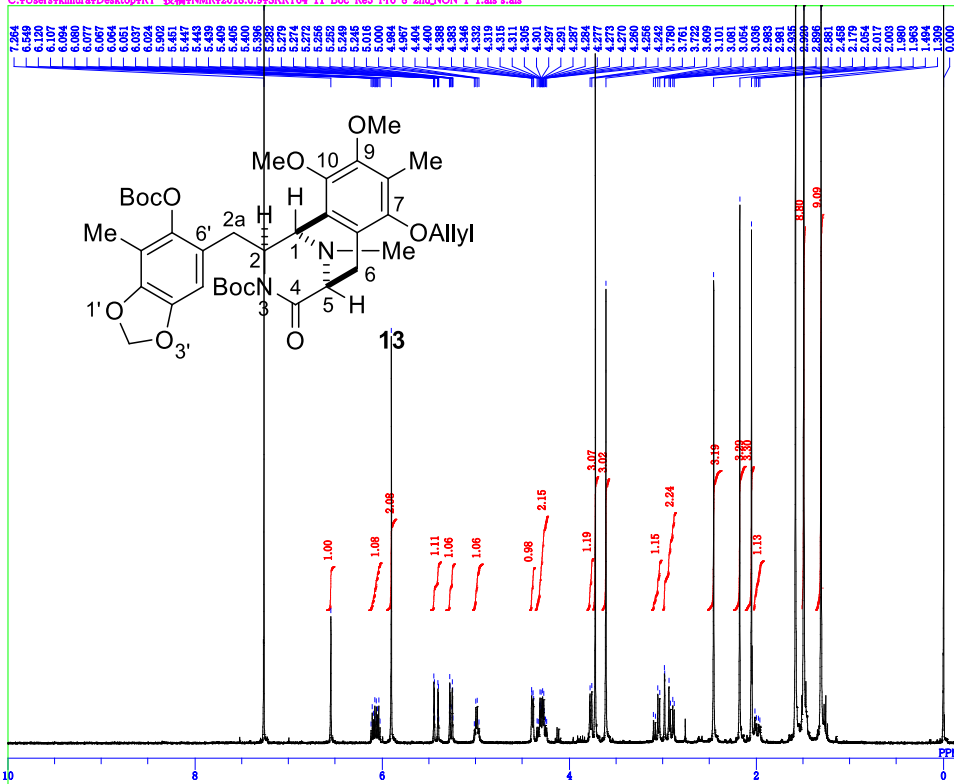

DFILE SKRT64-11-Boc-Re3-Pr6-  
 COMNT SKRT64-11-Boc-Re3-Pr6-  
 DATIM 2018-06-10 08:27:02  
 OBNUC 1H  
 EXMOD single\_pulse\_jp  
 OBFRQ 399.78 MHz  
 OBSST 4.19 KHz  
 OBFIN 7.29 Hz  
 POINT 26214  
 FREQU 6002.40 Hz  
 SCANS 16  
 ACQTM 4.3873 sec  
 PD 5.0000 sec  
 PW1 3.35 usec  
 IRNUC 1H  
 CTEMP 22.2 c  
 SLVNT CDCL3  
 EXREF 0.00 ppm  
 BF 0.01 Hz  
 RGAIN 50

DATAFILE 11-Boc-Re3-Pr6-11-1als.sals  
 C:\Users\kimura\Desktop\RT 投稿\NMR\2018.6.9\SKRT64-11-Boc-Re3-Pr6-8-BCM-1-1als.sals

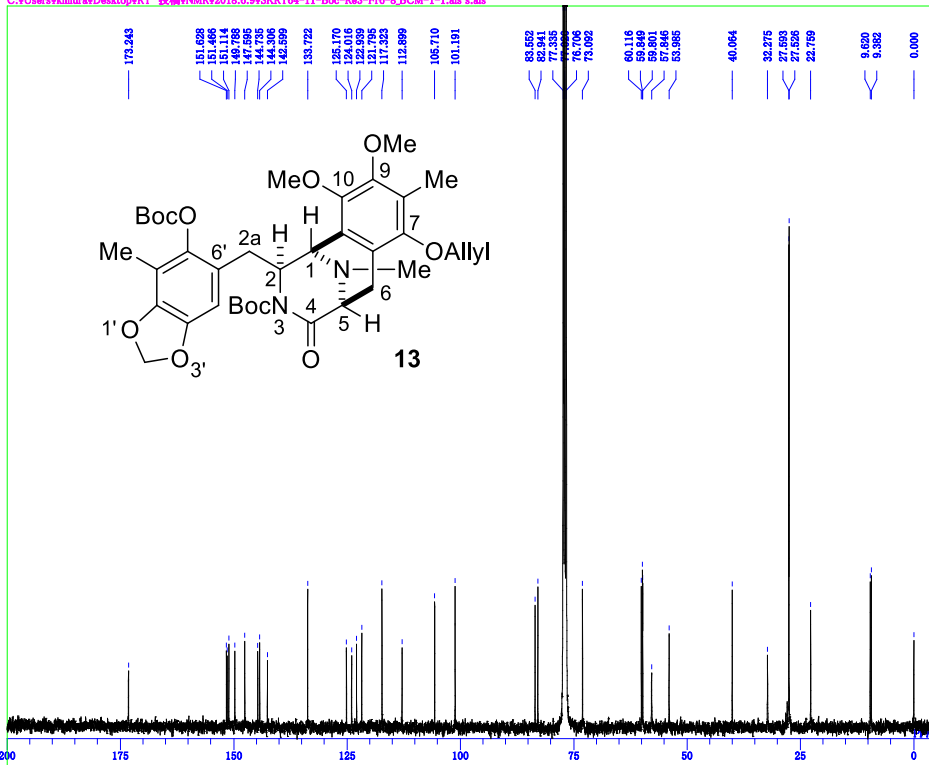

DFILE SKRT64-11-Boc-Re3-Pr6-  
 COMNT SKRT64-11-Boc-Re3-Pr6-  
 DATIM 2018-06-09 11:24:24  
 OBNUC 13C  
 EXMOD single\_pulse\_dec  
 OBFRQ 100.63 MHz  
 OBSST 5.35 KHz  
 OBFIN 5.89 Hz  
 POINT 32767  
 FREQU 31407.04 Hz  
 SCANS 2400  
 ACQTM 1.0453 sec  
 PD 2.0000 sec  
 PW1 3.60 usec  
 IRNUC 1H  
 CTEMP 21.7 c  
 SLVNT CDCL3  
 EXREF 0.00 ppm  
 BF 2.00 Hz  
 RGAIN 60

C:\Users\kimura\Desktop\RT 投稿\NMR\2018.6.9\SKRT68-2-NaBH4-Pr4-7\_NON-1-1.als.s.als

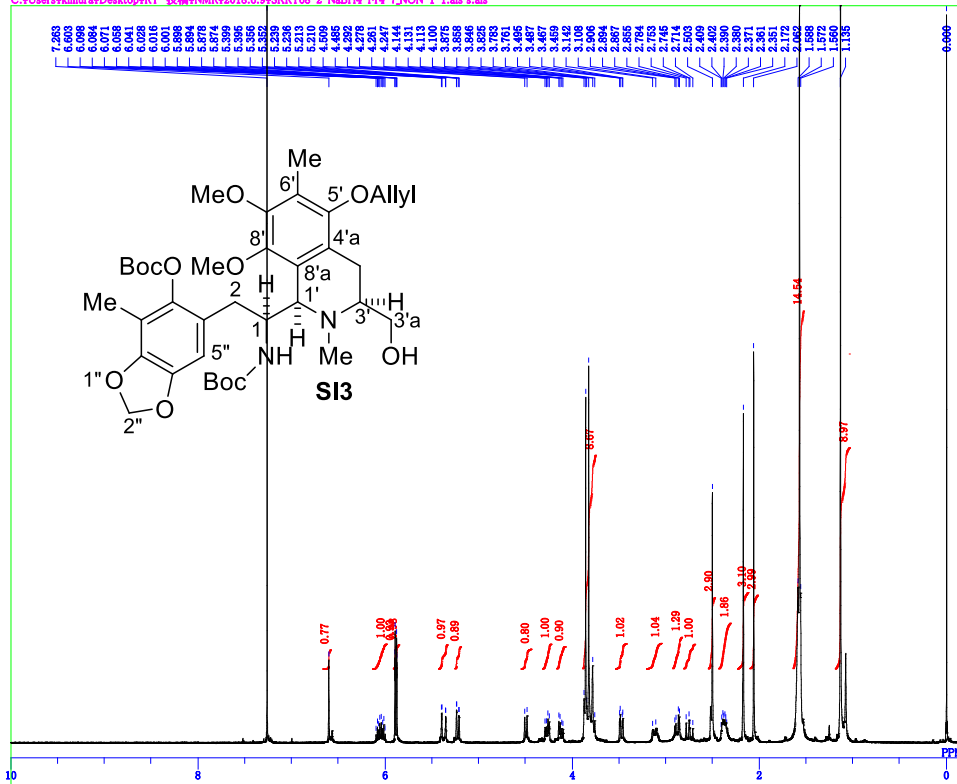

DFILE SKRT68-2-NaBH4-Pr4-7.J  
 COMNT SKRT68-2-NaBH4-Pr4-7-1  
 DATIM 2018-06-10 09:03:17  
 OBNUC 1H  
 EXMOD single\_pulse.jp  
 OBFRQ 399.78 MHz  
 OBSST 4.19 KHz  
 OBFIN 7.29 Hz  
 POINT 32767  
 FREQU 7503.00 Hz  
 SCANS 32  
 ACQTM 4.3673 sec  
 PD 5.0000 sec  
 PW1 3.35 usec  
 IRNUC 1H  
 CTEMP 21.8 c  
 SLVNT CDCL3  
 EXREF 0.00 ppm  
 BF 0.01 Hz  
 RGAIN 50

C:\Users\kimura\Desktop\RT 投稿\NMR\2018.6.9\SKRT68-2-NaBH4-Pr4-7\_BCM-1-1.als.s.als

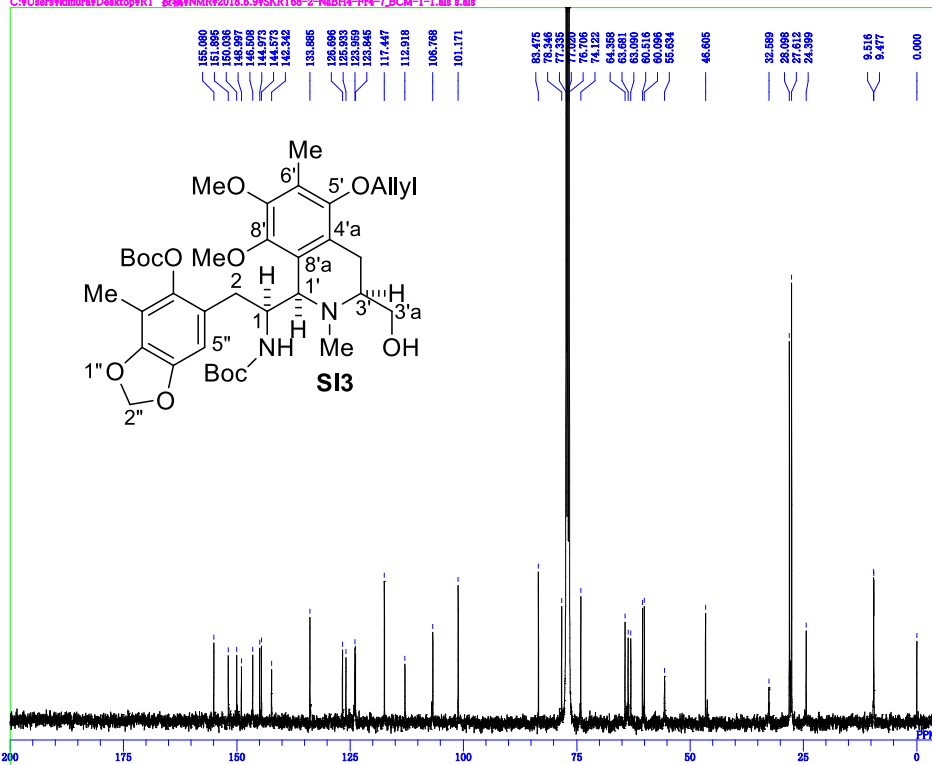

DFILE SKRT68-2-NaBH4-Pr4-7.1  
 COMNT SKRT68-2-NaBH4-Pr4-7-1  
 DATIM 2018-06-10 09:08:53  
 OBNUC 13C  
 EXMOD single\_pulse.dec  
 OBFRQ 100.63 MHz  
 OBSST 5.35 KHz  
 OBFIN 6.89 Hz  
 POINT 32767  
 FREQU 31407.04 Hz  
 SCANS 28000  
 ACQTM 1.0453 sec  
 PD 2.0000 sec  
 PW1 3.60 usec  
 IRNUC 13C  
 CTEMP 22.3 c  
 SLVNT CDCL3  
 EXREF 0.00 ppm  
 BF 2.00 Hz  
 RGAIN 60

DMX1102 1 1171 110 7 PCOM  
 FVRT 文獻作成SKRT69-1-TFA-Pr3-4-NON-2-1.sals

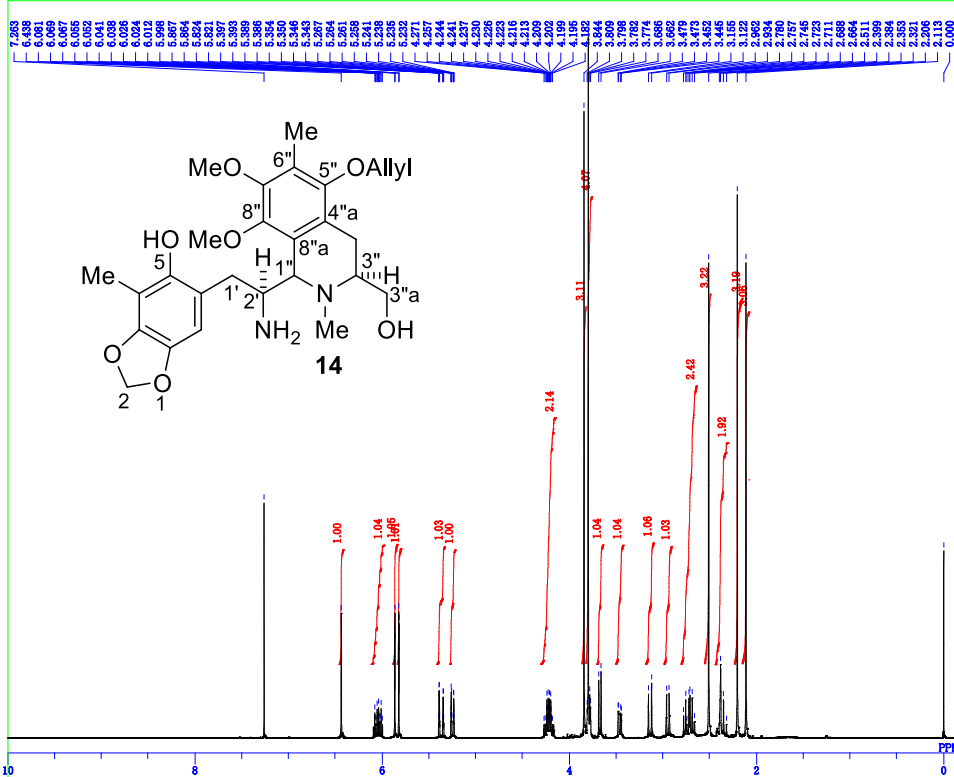

DFILE SKRT69-1-TFA-Pr3-4-NO  
 COMNT SKRT69-1-TFA-Pr3-4-NC  
 DATIM 2016-06-01 19:18:16  
 OBNUC 1H  
 EXMOD single\_pulse.jsp  
 OBFREQ 399.78 MHz  
 OBSSET 4.19 KHz  
 OBFIN 7.29 Hz  
 POINT 26214  
 FREQU 6002.40 Hz  
 SCANS 16  
 ACQTM 4.3873 sec  
 PD 2.0000 sec  
 PW1 3.00 usec  
 IRNUC 1H  
 CTMP 21.7 c  
 SLVNT CDCL3  
 EXREF 0.00 ppm  
 BF 0.01 Hz  
 RGAIN 34

DMX1102 1 1171 110 7 PCOM  
 FVRT 文獻作成SKRT69-1-TFA-Pr3-4-DCM-1-1.sals

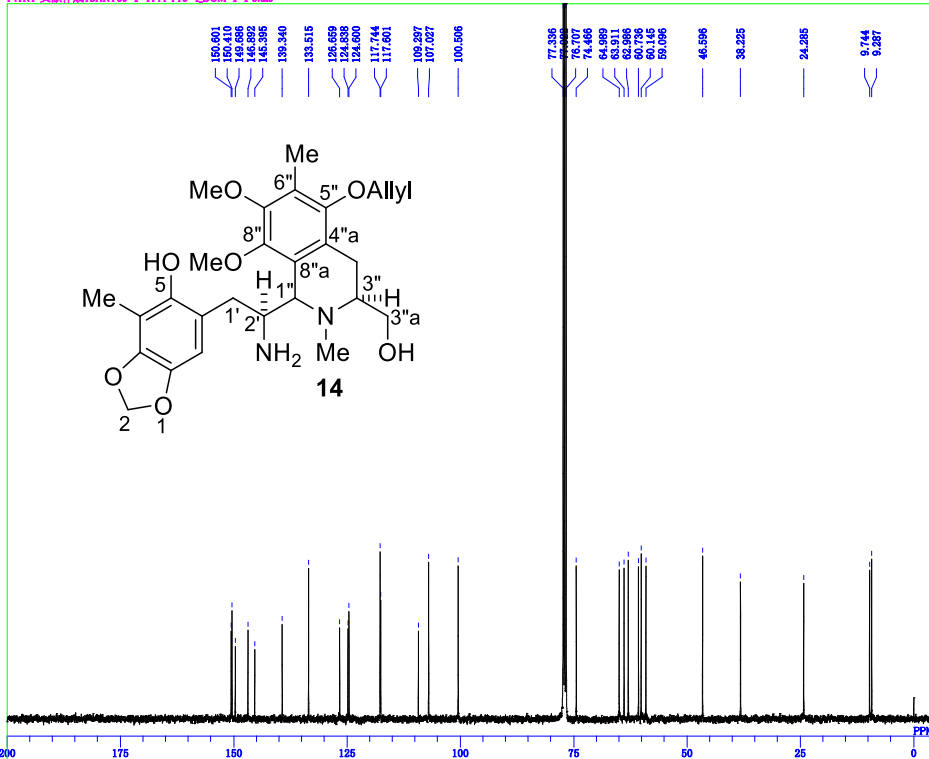

DFILE SKRT69-1-TFA-Pr3-4-BCI  
 COMNT SKRT69-1-TFA-Pr3-4-BC  
 DATIM 2016-06-01 19:22:50  
 OBNUC 13C  
 EXMOD single\_pulse.dec  
 OBFREQ 100.63 MHz  
 OBSSET 5.35 KHz  
 OBFIN 6.89 Hz  
 POINT 26214  
 FREQU 25125.63 Hz  
 SCANS 3000  
 ACQTM 1.0453 sec  
 PD 1.7000 sec  
 PW1 3.70 usec  
 IRNUC 1H  
 CTMP 22.3 c  
 SLVNT CDCL3  
 EXREF 0.00 ppm  
 BF 2.00 Hz  
 RGAIN 60

DMT10200 1 9 1700 1116 10 100 100  
 FVRT 文獻作或SKRT85,86-1-9-No6-Fr12-13-Re\_NON-1-1.sals

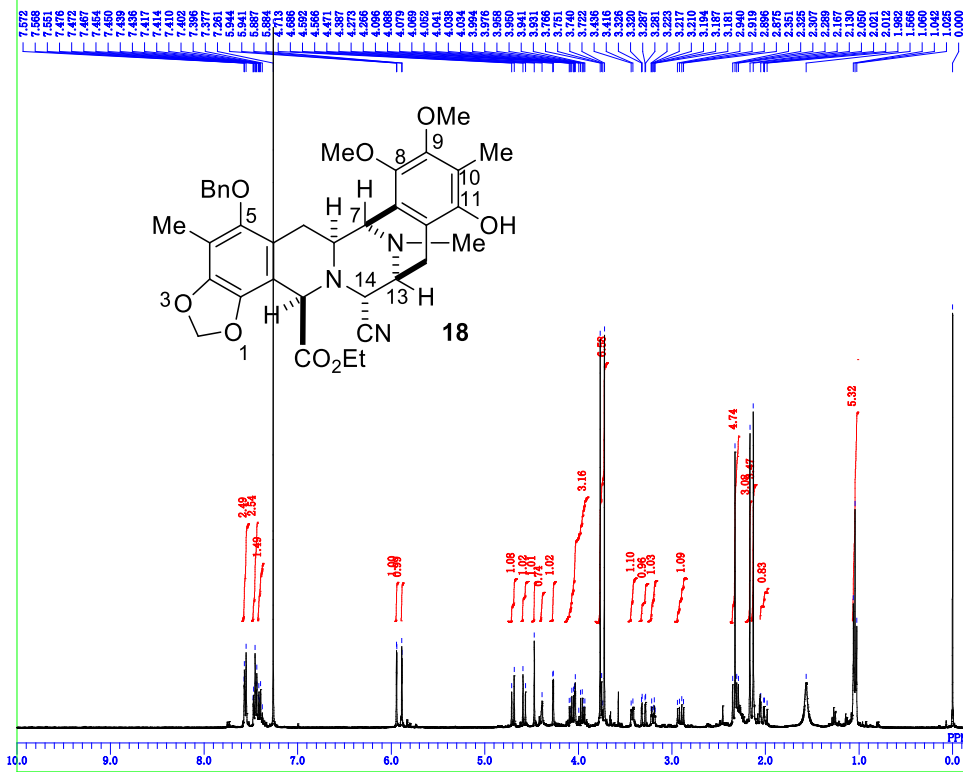

DFILE SKRT85,86-1-9-No6-Fr12  
 COMNT SKRT85,86-1-9-No6-Fr12  
 DATIM 2017-12-24 17:38:47  
 OBNUC 1H  
 EXMOD single\_pulse.jsp  
 OBFRQ 399.78 MHz  
 OBSST 4.19 KHz  
 OBFIN 7.29 Hz  
 POINT 26214  
 FREQU 6002.40 Hz  
 SCANS 16  
 ACQTM 4.3873 sec  
 PD 2.0000 sec  
 PW1 3.05 usec  
 IRNUC 1H  
 CTMP 23.1 c  
 SLVNT CDCL3  
 EXREF 0.00 ppm  
 BF 0.01 Hz  
 RGAIN 46

DMT10200 1 9 1700 1116 10 100 100  
 FVRT 文獻作或SKRT85,86-1-9-No6-Fr12-13-Re\_BCM-1-1.sals

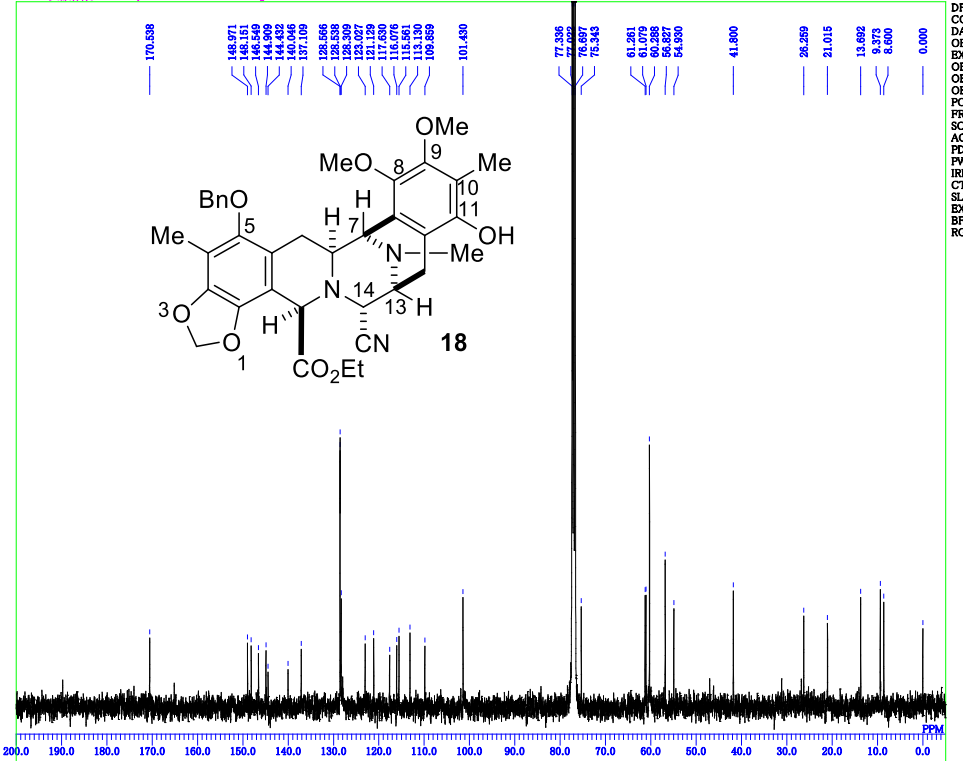

DFILE SKRT85,86-1-9-No6-Fr12  
 COMNT SKRT85,86-1-9-No6-Fr12  
 DATIM 2017-12-24 17:43:22  
 OBNUC 13C  
 EXMOD single\_pulse\_dec  
 OBFRQ 100.63 MHz  
 OBSST 5.35 KHz  
 OBFIN 6.89 Hz  
 POINT 26214  
 FREQU 26125.63 Hz  
 SCANS 900  
 ACQTM 1.0453 sec  
 PD 1.7000 sec  
 PW1 3.53 usec  
 IRNUC 13C  
 CTMP 23.2 c  
 SLVNT CDCL3  
 EXREF 0.00 ppm  
 BF 2.03 Hz  
 RGAIN 60

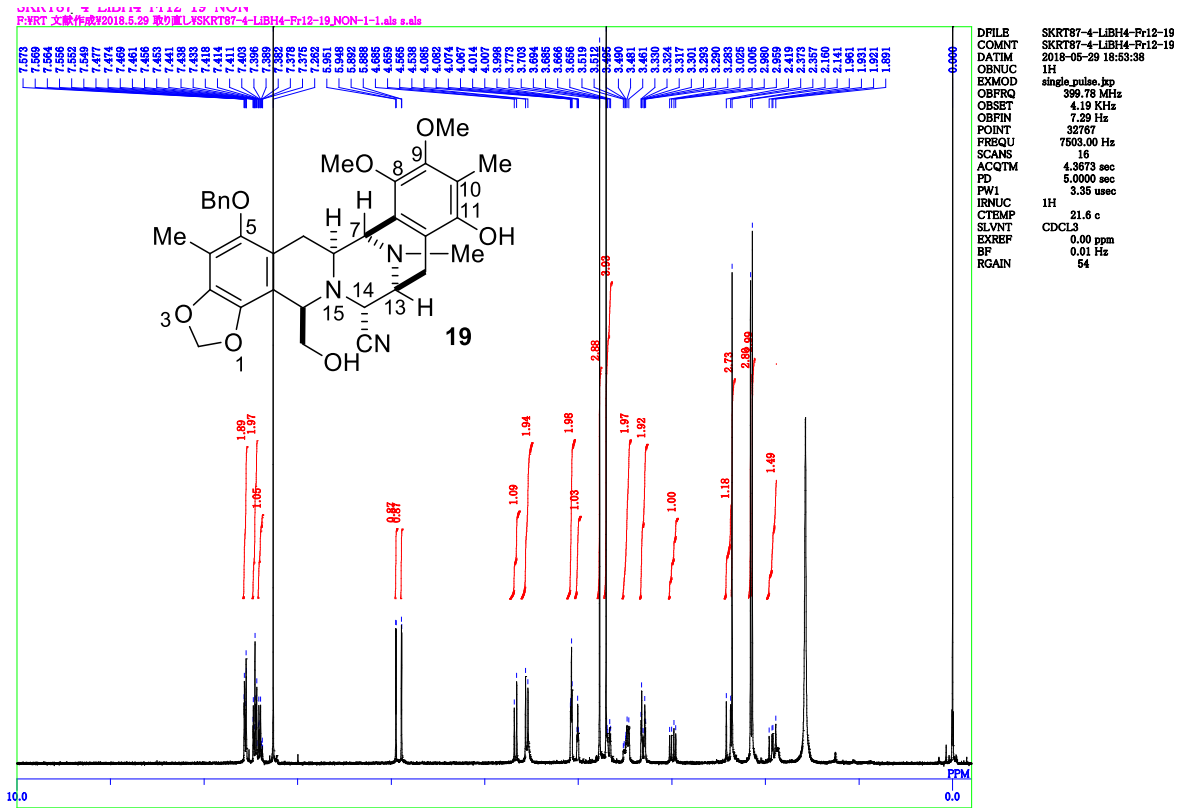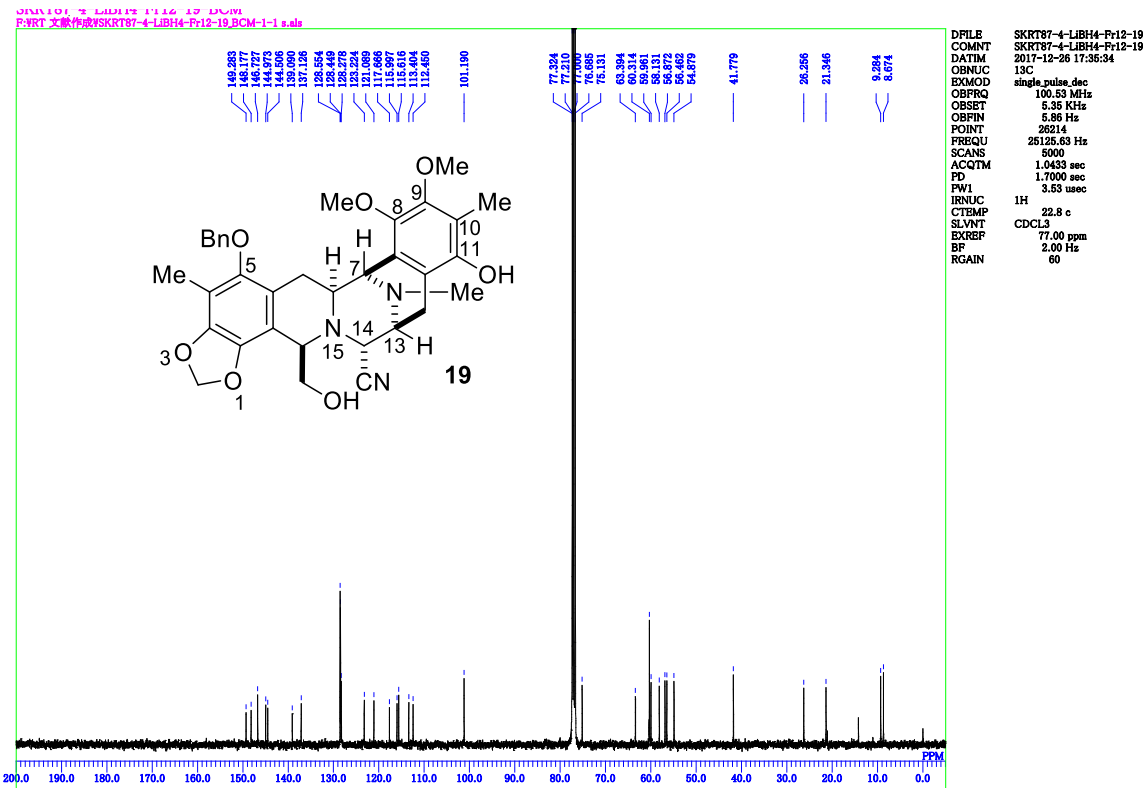

D:\NMR\2018\5.30 取付画\SKRT88-4-CAN-Ref4-6\_NON-1-1.sls  
 P:\VRT 文庫作成\2018.5.30 取付画\SKRT88-4-CAN-Ref4-6\_NON-1-1.sls

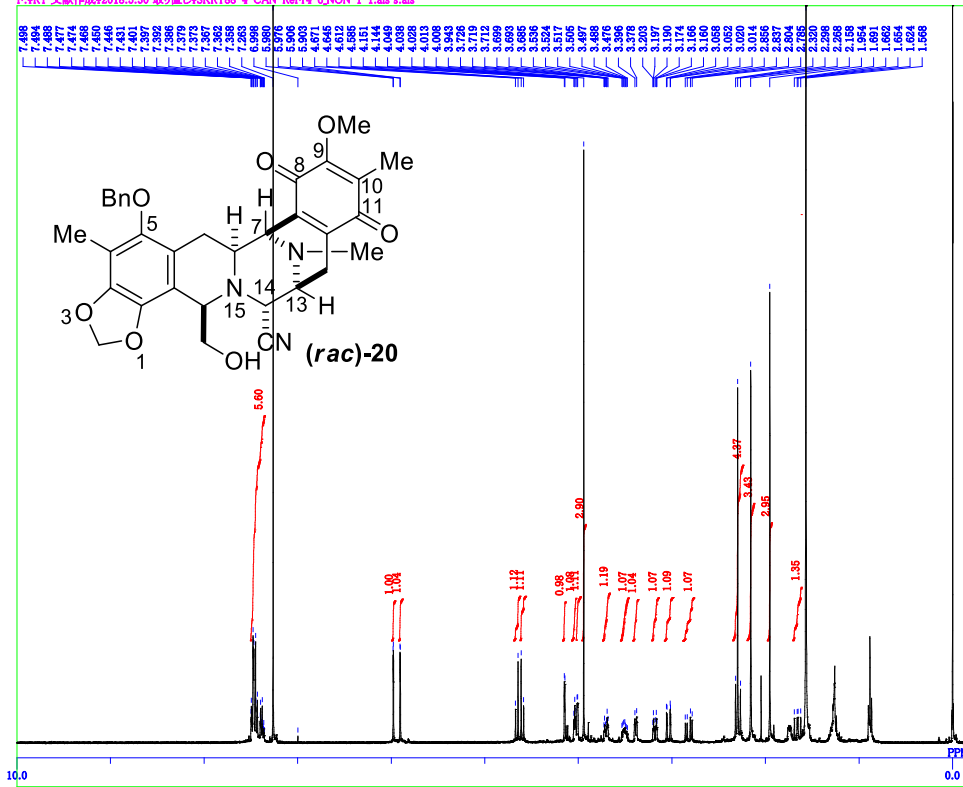

D:\NMR\2018\5.30 取付画\SKRT88-4-CAN-Ref4-6-  
 SKRT88-4-CAN-Ref4-6-  
 2018-05-30 19:16:49  
 1H  
 single\_pulse.jp  
 399.78 MHz  
 4.19 KHz  
 7.29 Hz  
 26214  
 6002.40 Hz  
 16  
 4.3873 sec  
 5.0000 sec  
 3.35 usec  
 1H  
 21.6 c  
 CDCL3  
 0.00 ppm  
 0.01 Hz  
 48

D:\NMR\2018\5.30 取付画\SKRT88-4-CAN-Ref4-8\_BCM-1-1.sls  
 P:\VRT 文庫作成\2018.5.30 取付画\SKRT88-4-CAN-Ref4-8\_BCM-1-1.sls

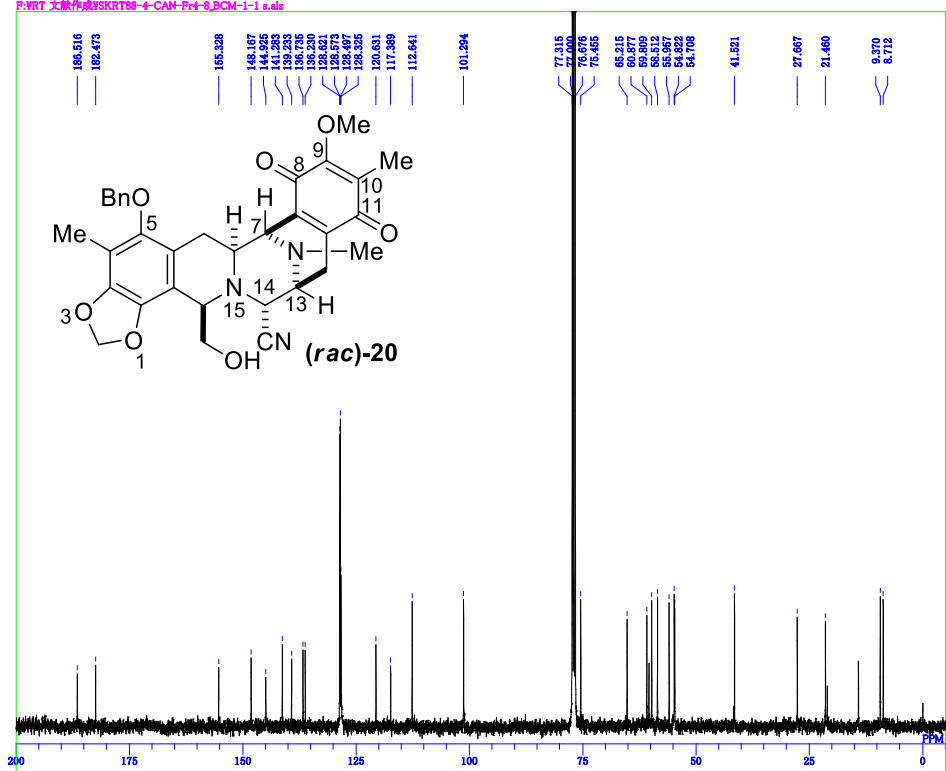

D:\NMR\2018\5.30 取付画\SKRT88-4-CAN-Ref4-8-  
 SKRT88-4-CAN-Ref4-8-  
 2018-01-20 18:56:48  
 13C  
 single\_pulse\_dec  
 100.53 MHz  
 5.35 KHz  
 5.85 Hz  
 26214  
 25125.63 Hz  
 10000  
 1.0453 sec  
 1.7000 sec  
 3.53 usec  
 1H  
 23.1 c  
 CDCL3  
 77.00 ppm  
 2.03 Hz  
 60



Authentic sample (+)-20 : M. Yokoya *et al.*, *J. Org. Chem.* **2016**, *81*, 4039-4047.

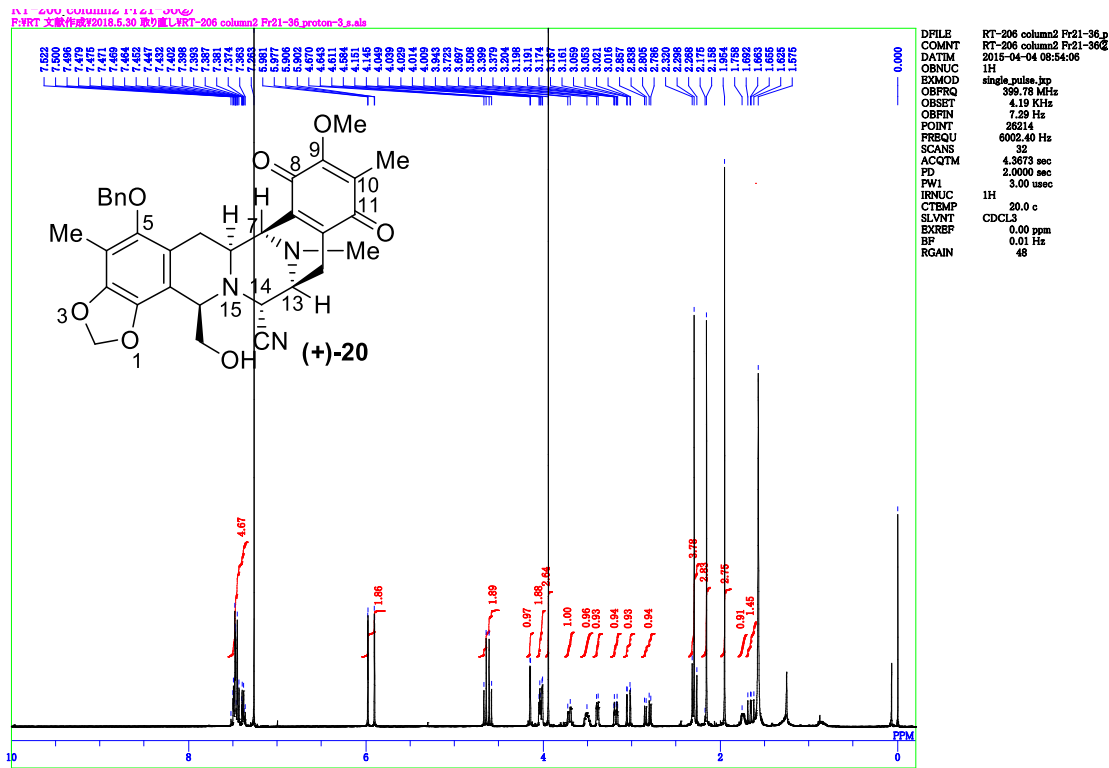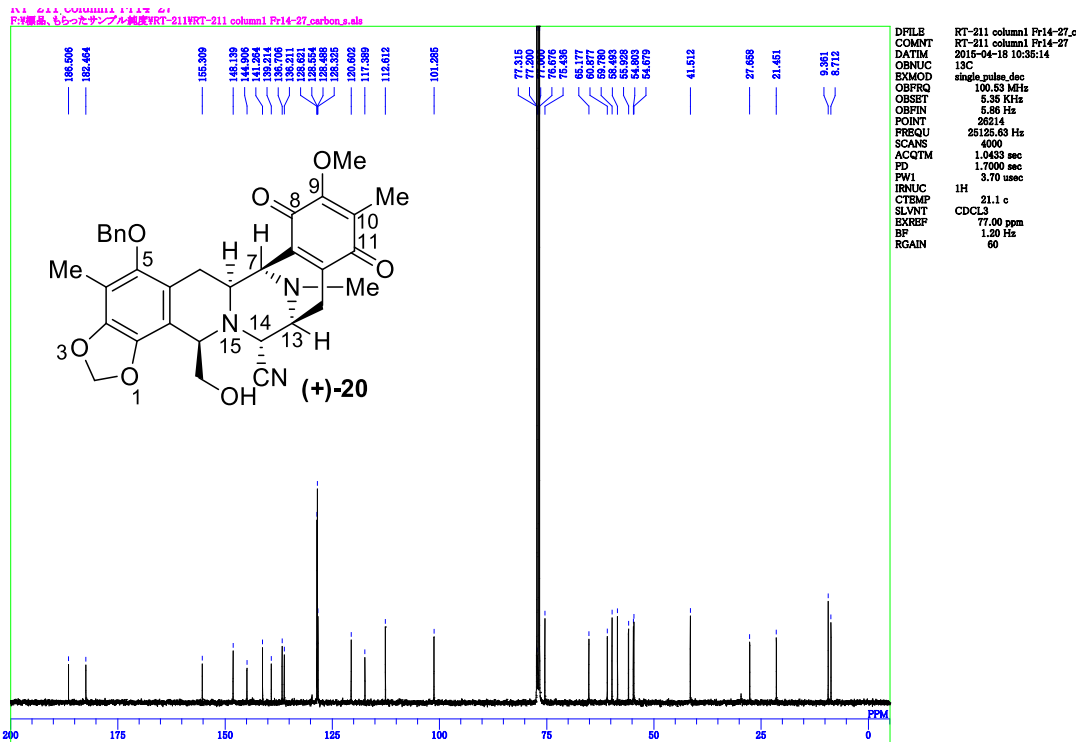

**Table 1.** Comparison of  $^1\text{H}$  and  $^{13}\text{C}$  NMR assignment for (*rac*)-**20** and (+)-**20**

| Atom No.                      | $^{13}\text{C}$ NMR, $\delta$ , multi. |                                  | $^1\text{H}$ NMR, $\delta$ (multi., integral, <i>J</i> in Hz) |                     |                              |                                             |                              |                                             |
|-------------------------------|----------------------------------------|----------------------------------|---------------------------------------------------------------|---------------------|------------------------------|---------------------------------------------|------------------------------|---------------------------------------------|
|                               | ( <i>rac</i> )- <b>20</b>              | (+)- <b>20</b>                   | (rac)- <b>20</b>                                              |                     | (+) <b>20</b>                |                                             |                              |                                             |
| 2                             | 101.3                                  | 101.3                            | t                                                             | 5.90<br>5.98        | (d, 1H, 1.4)<br>(d, 1H, 1.4) | 5.90<br>5.98                                | (d, 1H, 1.1)<br>(d, 1H, 1.1) |                                             |
| 3a                            | 144.9                                  | 144.9                            | s                                                             |                     |                              |                                             |                              |                                             |
| 4                             | 112.6 <sup>a</sup>                     | 112.6 <sup>a</sup>               | s                                                             |                     |                              |                                             |                              |                                             |
| 5                             | 148.2                                  | 148.1                            | s                                                             |                     |                              |                                             |                              |                                             |
| 5a                            | 120.6                                  | 120.6                            | s                                                             |                     |                              |                                             |                              |                                             |
| 6                             | 27.7                                   | 27.7                             | t                                                             | $\alpha$<br>$\beta$ | 3.04<br>1.66                 | (dd, 1H, 15.1, 2.7)<br>(dd, 1H, 15.1, 12.1) | 3.04<br>1.66                 | (dd, 1H, 15.1, 2.3)<br>(dd, 1H, 15.1, 12.0) |
| 6a                            | 56.0                                   | 55.9                             | d                                                             |                     | 3.18                         | (dt, 1H, 12.1, 2.7)                         | 3.18                         | (dt, 1H, 12.0, 2.3)                         |
| 7                             | 54.7 or 54.8                           | 54.7 or 54.8                     | d                                                             |                     | 4.01                         | (br d, 1H, 2.7)                             | 4.01                         | (br d, 1H, 2.3)                             |
| 7a                            | 136.2                                  | 136.2                            | s                                                             |                     |                              |                                             |                              |                                             |
| 8                             | 182.5                                  | 182.5                            | s                                                             |                     |                              |                                             |                              |                                             |
| 9                             | 155.3                                  | 155.3                            | s                                                             |                     |                              |                                             |                              |                                             |
| 10                            | 128.57                                 | 128.6                            | s                                                             |                     |                              |                                             |                              |                                             |
| 11                            | 186.5                                  | 186.5                            | s                                                             |                     |                              |                                             |                              |                                             |
| 11a                           | 141.3                                  | 141.3                            | s                                                             |                     |                              |                                             |                              |                                             |
| 12                            | 21.5                                   | 21.5                             | t                                                             | $\alpha$<br>$\beta$ | 2.82<br>2.29                 | (dd, 1H, 20.8, 7.6)<br>(d, 1H, 20.8)        | 2.82<br>2.29                 | (dd, 1H, 21.0, 7.5)<br>(d, 1H, 21.0)        |
| 13                            | 54.7 or 54.8                           | 54.7 or 54.8                     | d                                                             |                     | 3.39                         | (br d, 1H, 7.6)                             | 3.39                         | (dd, 1H, 7.5, 2.5)                          |
| 14                            | 59.8                                   | 59.8                             | d                                                             |                     | 4.15                         | (d, 1H, 2.5)                                | 4.15                         | (d, 1H, 2.5)                                |
| 16                            | 58.5                                   | 58.5                             | d                                                             |                     | 4.04                         | (t, 1H, 4.3)                                | 4.04                         | (t, 1H, 4.2)                                |
| 16a                           | 112.6 <sup>a</sup>                     | 112.6 <sup>a</sup>               | s                                                             |                     |                              |                                             |                              |                                             |
| 16b                           | 139.2                                  | 139.2                            | s                                                             |                     |                              |                                             |                              |                                             |
| 4-CH <sub>3</sub>             | 9.4                                    | 9.4                              | q                                                             |                     | 2.16                         | (s, 3H)                                     | 2.16                         | (s, 3H)                                     |
| 10-CH <sub>3</sub>            | 8.7                                    | 8.7                              | q                                                             |                     | 1.95                         | (s, 3H)                                     | 1.95                         | (s, 3H)                                     |
| 9-OCH <sub>3</sub>            | 60.9                                   | 60.9                             | q                                                             |                     | 3.94                         | (s, 3H)                                     | 3.94                         | (s, 3H)                                     |
| C <sub>6</sub> H <sub>5</sub> | 136.7<br>128.62<br>128.5<br>128.3      | 136.7<br>128.6<br>128.5<br>128.3 | s<br>d<br>d<br>d                                              |                     | 7.50-7.36                    | (m, 5H)                                     | 7.50-7.36                    | (m, 5H)                                     |
| CN                            | 117.4                                  | 117.4                            | s                                                             |                     |                              |                                             |                              |                                             |
| PhCH <sub>2</sub>             | 75.5                                   | 75.4                             | t                                                             |                     | 4.60<br>4.66                 | (d, 1H, 10.6)<br>(d, 1H, 10.6)              | 4.60<br>4.66                 | (d, 1H, 10.8)<br>(d, 1H, 10.8)              |
| CH <sub>2</sub> OH            | 65.2                                   | 65.2                             | t                                                             |                     | 3.71<br>3.51                 | (br d, 1H, 10.8)<br>(m, 1H)                 | 3.71<br>3.54-3.48            | (br d, 1H, 10.9)<br>(m, 1H)                 |
| NCH <sub>3</sub>              | 41.5                                   | 41.5                             | q                                                             |                     | 2.30                         | (s, 3H)                                     | 2.30                         | (s, 3H)                                     |

<sup>a</sup> overlapped.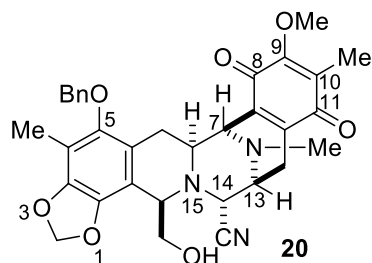

Supplement: OPEN-7-764-s001.pdf [file OPEN-7-764-s001.pdf]
